# Supplementary material for: Dolomite reference material synthesized by pressureless sintering for laser ablation MC-ICP-MS carbon and magnesium isotope analysis
Source: Royal Society of Chemistry journal article supplement (doi:10.1039/d3ja00385j), 2024-01-01

Appendix Figure 1. Particle size distribution for sample powders after different milling times determined by a BT-9300ST laser particle size analysis system. The red line indicates the differential distribution, a measure of the percentage of particle content that falls between two adjacent particle sizes. The blue line represents the cumulative particle size distribution, showing the total percentage of particle size.

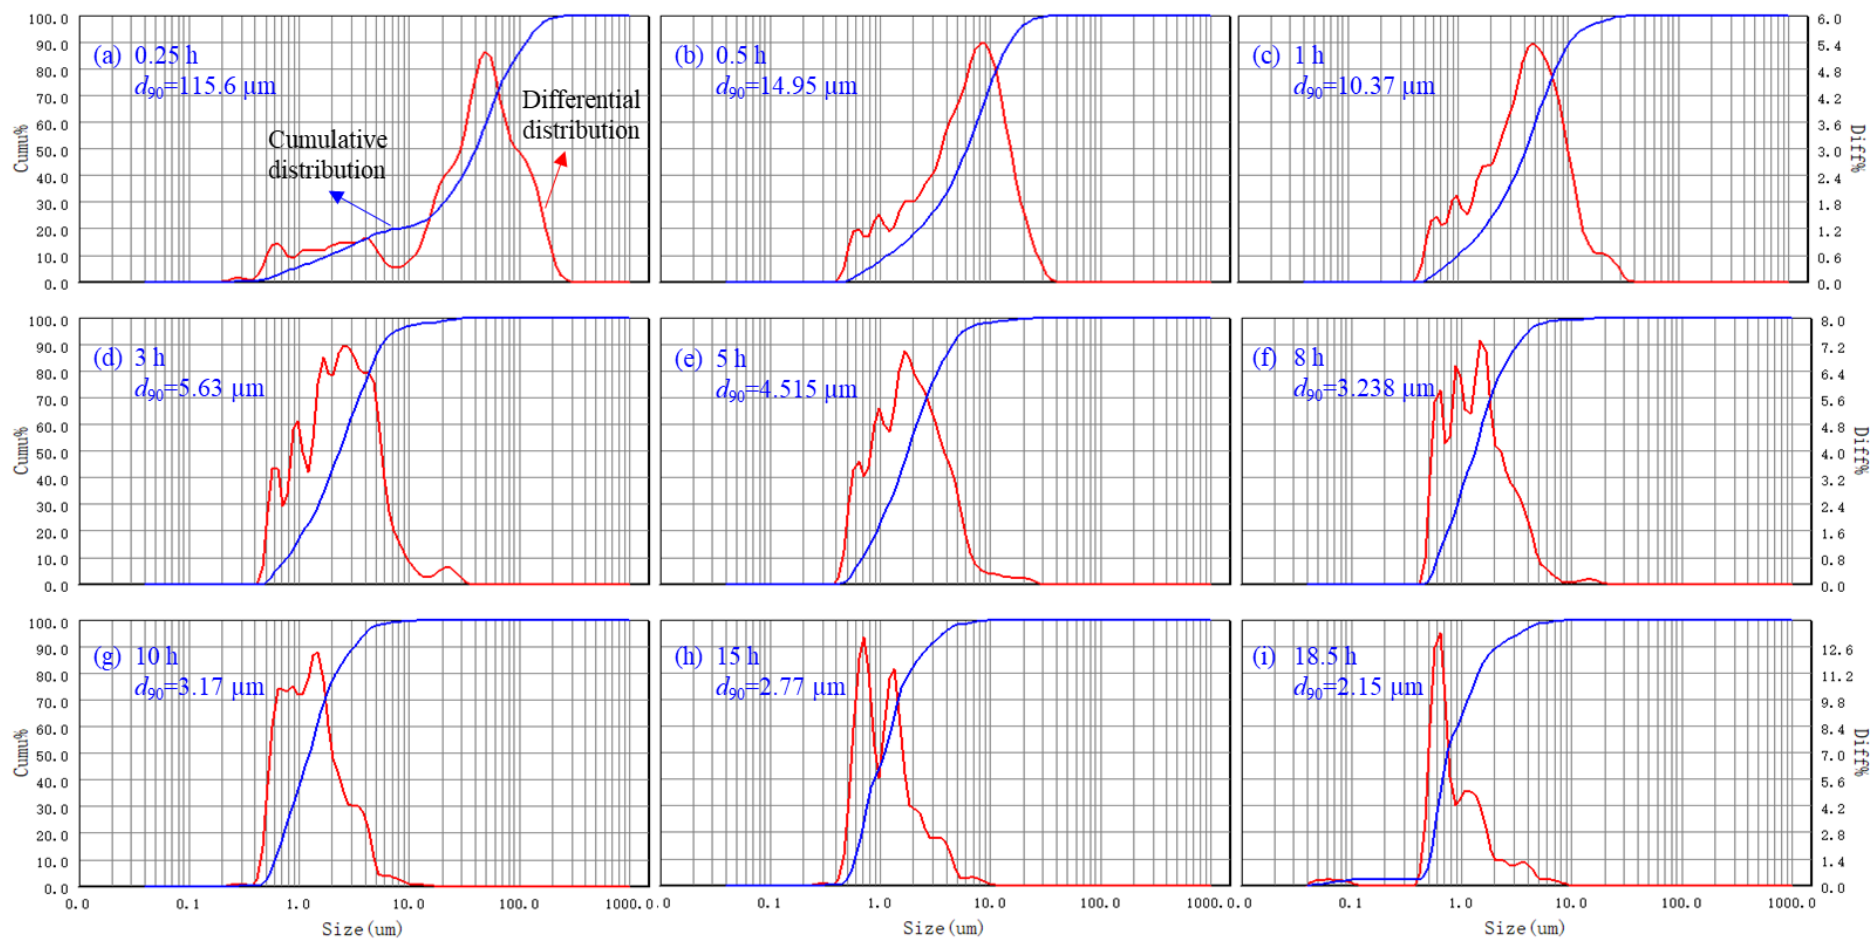

Supplement: d3ja00385j1.pdf [file d3ja00385j1.pdf]
